# Supplementary material for: Zn(ii) coordination to tren-based tris-macrocycles. Activity of their trinuclear Zn(ii) complexes in carboxy- and phosphate-ester hydrolysis
Source: Royal Society of Chemistry journal article supplement (doi:10.1039/b306577d), 2003-01-01
Supplement: b306577d.pdf [file b306577d.pdf]

**Table S1.** Protonation constants of **L1** and **L2** in 0.1 M NMe<sub>4</sub>NO<sub>3</sub> aqueous solution at 298.1 and 308.1 K

|                                                                  | <b>L1</b> |          | <b>L2</b> |          |
|------------------------------------------------------------------|-----------|----------|-----------|----------|
|                                                                  | 298.1 K   | 308.1 K  | 298.1 K   | 308.1 K  |
| $\mathbf{L} + \mathbf{H}^+ = \mathbf{LH}^+$                      | 10.75(3)  | 10.90(8) | 11.16(4)  | 11.22(3) |
| $\mathbf{LH}^+ + \mathbf{H}^+ = \mathbf{LH}_2^{2+}$              | 10.38(3)  | 10.45(8) | 10.55(4)  | 10.65(3) |
| $\mathbf{LH}_2^{2+} + \mathbf{H}^+ = \mathbf{LH}_3^{3+}$         | 9.83(3)   | 9.94(1)  | 10.13(4)  | 10.20(3) |
| $\mathbf{LH}_3^{3+} + \mathbf{H}^+ = \mathbf{LH}_4^{4+}$         | 8.99(5)   | 8.95(1)  | 9.22(4)   | 9.30(3)  |
| $\mathbf{LH}_4^{4+} + \mathbf{H}^+ = \mathbf{LH}_5^{5+}$         | 8.71(3)   | 8.87(2)  | 8.98(4)   | 9.05(3)  |
| $\mathbf{LH}_5^{5+} + \mathbf{H}^+ = \mathbf{LH}_6^{6+}$         | 8.33(7)   | 8.44(2)  | 8.54(5)   | 8.64(3)  |
| $\mathbf{LH}_6^{6+} + \mathbf{H}^+ = \mathbf{LH}_7^{7+}$         | 6.31(1)   | 6.60(2)  | 7.62(5)   | 7.73(3)  |
| $\mathbf{LH}_7^{7+} + \mathbf{H}^+ = \mathbf{LH}_8^{8+}$         | 4.06(1)   | 4.14(2)  | 5.99(5)   | 6.09(3)  |
| $\mathbf{LH}_8^{8+} + \mathbf{H}^+ = \mathbf{LH}^{9+}$           |           |          | 5.78(5)   | 6.01(4)  |
| $\mathbf{LH}_9^{9+} + \mathbf{H}^+ = \mathbf{LH}_{10}^{10+}$     |           |          | 5.11(5)   | 5.18(4)  |
| $\mathbf{LH}_{10}^{10+} + \mathbf{H}^+ = \mathbf{LH}_{11}^{11+}$ |           |          | 4.90(5)   | 5.04(4)  |
